# Supplementary material for: Exome sequencing of lymphomas from three dog breeds reveals somatic mutation patterns reflecting genetic background
Source: PubMed Central journal article supplement (PMC4617960; doi:10.1101/gr.194449.115), 2015-11
Supplement: supp_gr.194449.115_Supp_Table2.pdf [file supp_gr.194449.115_Supp_Table2.pdf]

**Supplementary Table 2.** All significantly mutated genes. Multiple mutations in one gene in one individual are counted as one. CT, convolution test.

**Cocker spaniel, B-cell**

| Gene                      | geneID         | P-value CT | FDR CT   |
|---------------------------|----------------|------------|----------|
| <i>ENSCAFG00000030674</i> | <i>FAM90A1</i> | 3.47E-09   | 8.51E-05 |
| <i>ENSCAFG00000014251</i> | <i>DDX3X</i>   | 1.72E-08   | 2.10E-04 |
| <i>ENSCAFG00000018075</i> | <i>TRAF3</i>   | 6.44E-08   | 5.26E-04 |
| <i>ENSCAFG00000006496</i> | <i>MITF</i>    | 1.70E-07   | 1.04E-03 |
| <i>ENSCAFG00000001396</i> | <i>PSMA1</i>   | 4.11E-07   | 2.02E-03 |
| <i>ENSCAFG00000001086</i> | <i>MYC</i>     | 1.46E-06   | 5.98E-03 |
| <i>ENSCAFG00000001754</i> | <i>GRIFIN</i>  | 6.07E-06   | 2.13E-02 |
| <i>ENSCAFG00000016403</i> | <i>POT1</i>    | 8.15E-06   | 2.22E-02 |

**Golden retriever, B-cell**

| Gene                      | geneID            | P-value CT | FDR CT   |
|---------------------------|-------------------|------------|----------|
| <i>ENSCAFG00000008141</i> | <i>FBXW7</i>      | 0.00E+00   | 0.00E+00 |
| <i>ENSCAFG00000001754</i> | <i>POT1</i>       | 1.10E-22   | 1.34E-18 |
| <i>ENSCAFG00000018075</i> | <i>TRAF3</i>      | 1.56E-19   | 1.28E-15 |
| <i>ENSCAFG00000030674</i> | <i>FAM90A1</i>    | 2.36E-18   | 1.45E-14 |
| <i>ENSCAFG00000031638</i> | <i>ENSCAFG000</i> | 5.30E-18   | 2.60E-14 |
| <i>ENSCAFG00000016714</i> | <i>TP53</i>       | 2.25E-17   | 9.18E-14 |
| <i>ENSCAFG00000030839</i> | <i>PNRC1</i>      | 1.07E-12   | 3.76E-09 |
| <i>ENSCAFG00000000578</i> | <i>FKBP3</i>      | 1.26E-09   | 3.32E-06 |
| <i>ENSCAFG00000025100</i> | <i>TBC1D26</i>    | 1.13E-09   | 3.32E-06 |
| <i>ENSCAFG00000017753</i> | <i>RPL23A</i>     | 1.35E-09   | 3.32E-06 |
| <i>ENSCAFG00000025123</i> | <i>FAM90A1</i>    | 6.43E-09   | 1.43E-05 |
| <i>ENSCAFG00000006180</i> | <i>SOCS2</i>      | 7.75E-09   | 1.58E-05 |
| <i>ENSCAFG00000001396</i> | <i>PSMA1</i>      | 1.21E-08   | 2.28E-05 |
| <i>ENSCAFG00000014251</i> | <i>DDX3X</i>      | 1.99E-08   | 3.48E-05 |
| <i>ENSCAFG00000013392</i> | <i>SETD2</i>      | 3.33E-08   | 5.44E-05 |
| <i>ENSCAFG00000013774</i> | <i>MAP3K14</i>    | 1.50E-07   | 2.17E-04 |
| <i>ENSCAFG00000005151</i> | <i>BRK1</i>       | 3.73E-07   | 5.08E-04 |
| <i>ENSCAFG00000029820</i> | <i>ENSCAFG000</i> | 4.89E-07   | 6.31E-04 |
| <i>ENSCAFG00000017032</i> | <i>ENSCAFG000</i> | 7.47E-07   | 9.16E-04 |
| <i>ENSCAFG00000030482</i> | <i>ENSCAFG000</i> | 8.30E-07   | 9.69E-04 |
| <i>ENSCAFG00000030950</i> | <i>ENSCAFG000</i> | 1.46E-06   | 1.63E-03 |
| <i>ENSCAFG00000013453</i> | <i>KLRK1</i>      | 1.88E-06   | 2.00E-03 |
| <i>ENSCAFG00000010684</i> | <i>LINS</i>       | 1.99E-06   | 2.04E-03 |
| <i>ENSCAFG00000014042</i> | <i>KLRK1</i>      | 2.27E-06   | 2.22E-03 |
| <i>ENSCAFG00000003796</i> | <i>MAPRE1</i>     | 2.39E-06   | 2.25E-03 |
| <i>ENSCAFG00000014958</i> | <i>RPL22</i>      | 3.15E-06   | 2.86E-03 |

|                           |                      |          |          |
|---------------------------|----------------------|----------|----------|
| <i>ENSCAFG00000009912</i> | <i>ERG</i>           | 3.79E-06 | 3.31E-03 |
| <i>ENSCAFG00000028928</i> | <i>OR5AC1</i>        | 4.74E-06 | 4.01E-03 |
| <i>ENSCAFG00000017316</i> | <i>ENSCAFG000</i>    | 5.63E-06 | 4.61E-03 |
| <i>ENSCAFG00000013551</i> | <i>ATP5H</i>         | 6.02E-06 | 4.76E-03 |
| <i>ENSCAFG00000029241</i> | <i>ENSCAFG000</i>    | 6.53E-06 | 4.85E-03 |
| <i>ENSCAFG00000029904</i> | <i>HBA1</i>          | 6.39E-06 | 4.85E-03 |
| <i>ENSCAFG00000016289</i> | <i>CTB-167G5.5</i>   | 7.40E-06 | 5.33E-03 |
| <i>ENSCAFG00000011598</i> | <i>KPNA2</i>         | 1.03E-05 | 7.20E-03 |
| <i>ENSCAFG00000019962</i> | <i>TAF1C</i>         | 1.15E-05 | 7.80E-03 |
| <i>ENSCAFG00000013060</i> | <i>PKD1</i>          | 1.21E-05 | 7.82E-03 |
| <i>ENSCAFG00000016528</i> | <i>NTRK1</i>         | 1.21E-05 | 7.82E-03 |
| <i>ENSCAFG00000032009</i> | <i>ENSCAFG000</i>    | 1.35E-05 | 8.51E-03 |
| <i>ENSCAFG00000000595</i> | <i>ENSCAFG000</i>    | 1.46E-05 | 8.92E-03 |
| <i>ENSCAFG00000016251</i> | <i>EMR2</i>          | 1.57E-05 | 9.39E-03 |
| <i>ENSCAFG00000030976</i> | <i>ENSCAFG000</i>    | 1.83E-05 | 1.07E-02 |
| <i>ENSCAFG00000010012</i> | <i>ST13</i>          | 1.90E-05 | 1.09E-02 |
| <i>ENSCAFG00000024522</i> | <i>ENSCAFG000</i>    | 1.99E-05 | 1.11E-02 |
| <i>ENSCAFG00000032455</i> | <i>ENSCAFG000</i>    | 2.07E-05 | 1.13E-02 |
| <i>ENSCAFG00000009973</i> | <i>EEF1A2</i>        | 2.16E-05 | 1.15E-02 |
| <i>ENSCAFG00000006036</i> | <i>HNRNPA1P1</i>     | 2.33E-05 | 1.21E-02 |
| <i>ENSCAFG00000025327</i> | <i>SOX17</i>         | 2.40E-05 | 1.22E-02 |
| <i>ENSCAFG00000001336</i> | <i>ISCA1</i>         | 2.51E-05 | 1.26E-02 |
| <i>ENSCAFG00000030845</i> | <i>HIST2H3PS2</i>    | 2.62E-05 | 1.29E-02 |
| <i>ENSCAFG00000014107</i> | <i>RPL23A</i>        | 3.23E-05 | 1.52E-02 |
| <i>ENSCAFG00000018032</i> | <i>C16orf88</i>      | 3.91E-05 | 1.81E-02 |
| <i>ENSCAFG00000029913</i> | <i>ENSCAFG000</i>    | 6.40E-05 | 2.85E-02 |
| <i>ENSCAFG00000019424</i> | <i>PKD1</i>          | 6.68E-05 | 2.92E-02 |
| <i>ENSCAFG00000006873</i> | <i>ZDHHC2</i>        | 7.21E-05 | 3.05E-02 |
| <i>ENSCAFG00000004640</i> | <i>EEF1A1</i>        | 7.21E-05 | 3.05E-02 |
| <i>ENSCAFG00000006663</i> | <i>intron of SNX</i> | 7.78E-05 | 3.23E-02 |
| <i>ENSCAFG00000031340</i> | <i>ENSCAFG000</i>    | 9.09E-05 | 3.60E-02 |
| <i>ENSCAFG00000005959</i> | <i>CWC15</i>         | 8.99E-05 | 3.60E-02 |
| <i>ENSCAFG00000020326</i> | <i>DUS2L</i>         | 8.90E-05 | 3.60E-02 |
| <i>ENSCAFG00000000039</i> | <i>DOK6</i>          | 9.63E-05 | 3.75E-02 |
| <i>ENSCAFG00000005185</i> | <i>XRN2</i>          | 9.91E-05 | 3.80E-02 |
| <i>ENSCAFG00000024545</i> | <i>PDIA6</i>         | 1.09E-04 | 3.90E-02 |
| <i>ENSCAFG00000014786</i> | <i>PHC3</i>          | 1.09E-04 | 3.90E-02 |
| <i>ENSCAFG00000031200</i> | <i>ENSCAFG000</i>    | 1.06E-04 | 3.90E-02 |
| <i>ENSCAFG00000008450</i> | <i>WDR17</i>         | 1.10E-04 | 3.90E-02 |
| <i>ENSCAFG00000028889</i> | <i>USP17L2</i>       | 1.05E-04 | 3.90E-02 |
| <i>ENSCAFG00000003493</i> | <i>ENSCAFG000</i>    | 1.21E-04 | 4.22E-02 |
| <i>ENSCAFG00000004229</i> | <i>GLUD2</i>         | 1.26E-04 | 4.28E-02 |

|                            |                   |          |          |
|----------------------------|-------------------|----------|----------|
| <i>ENSCAFG00000008814</i>  | <i>ENSCAFG000</i> | 1.25E-04 | 4.28E-02 |
| <i>ENSCAFG00000006166</i>  | <i>MDH2</i>       | 1.51E-04 | 4.99E-02 |
| <i>ENSCAFG000000031827</i> | <i>ZNF486</i>     | 1.50E-04 | 4.99E-02 |

### Boxer, T-cell

| Gene                       | geneID        | P-value CT | FDR CT   |
|----------------------------|---------------|------------|----------|
| <i>ENSCAFG000000015670</i> | <i>PTEN</i>   | 2.52E-11   | 6.19E-07 |
| <i>ENSCAFG000000005839</i> | <i>SATB1</i>  | 3.61E-10   | 4.42E-06 |
| <i>ENSCAFG000000017298</i> | <i>MAP2K1</i> | 2.28E-06   | 1.86E-02 |
| <i>ENSCAFG000000006937</i> | <i>EEF1A1</i> | 6.40E-06   | 3.26E-02 |
| <i>ENSCAFG000000006714</i> | <i>NLRP14</i> | 6.64E-06   | 3.26E-02 |
| <i>ENSCAFG000000024216</i> | <i>KCND2</i>  | 1.22E-05   | 4.99E-02 |

### Golden retriever, T-cell

| Gene                       | geneID            | P-value CT | FDR CT   |
|----------------------------|-------------------|------------|----------|
| <i>ENSCAFG000000001396</i> | <i>PSMA1</i>      | 4.86E-13   | 1.19E-08 |
| <i>ENSCAFG000000024399</i> | <i>COX8A</i>      | 1.51E-11   | 1.85E-07 |
| <i>ENSCAFG000000006440</i> | <i>LTA4H</i>      | 1.95E-09   | 1.19E-05 |
| <i>ENSCAFG000000025100</i> | <i>TBC1D26</i>    | 1.57E-09   | 1.19E-05 |
| <i>ENSCAFG000000000584</i> | <i>ZNF706</i>     | 1.77E-08   | 8.69E-05 |
| <i>ENSCAFG000000013551</i> | <i>ATP5H</i>      | 7.49E-08   | 3.06E-04 |
| <i>ENSCAFG000000031638</i> | <i>ENSCAFG000</i> | 1.45E-07   | 5.09E-04 |
| <i>ENSCAFG000000014463</i> | <i>PTPN6</i>      | 3.23E-07   | 9.91E-04 |
| <i>ENSCAFG000000002501</i> | <i>NLRP5</i>      | 3.68E-07   | 1.00E-03 |
| <i>ENSCAFG000000004229</i> | <i>GLUD2</i>      | 6.04E-07   | 1.48E-03 |
| <i>ENSCAFG000000013232</i> | <i>RPL11</i>      | 6.92E-07   | 1.54E-03 |
| <i>ENSCAFG000000005839</i> | <i>SATB1</i>      | 3.44E-06   | 7.04E-03 |
| <i>ENSCAFG000000017753</i> | <i>RPL23A</i>     | 4.08E-06   | 7.70E-03 |
| <i>ENSCAFG000000011017</i> | <i>KRTAP10-6</i>  | 5.13E-06   | 8.98E-03 |
| <i>ENSCAFG000000019029</i> | <i>MAGEC2</i>     | 6.38E-06   | 1.04E-02 |
| <i>ENSCAFG000000002232</i> | <i>HNRNPA1L2</i>  | 1.05E-05   | 1.61E-02 |
| <i>ENSCAFG000000029913</i> | <i>ENSCAFG000</i> | 1.73E-05   | 2.23E-02 |
| <i>ENSCAFG000000011895</i> | <i>PTAFR</i>      | 1.59E-05   | 2.23E-02 |
| <i>ENSCAFG000000008141</i> | <i>FBXW7</i>      | 2.19E-05   | 2.68E-02 |
| <i>ENSCAFG000000015252</i> | <i>NME7</i>       | 2.97E-05   | 3.47E-02 |

### All B-cell (cocker spaniel + golden retriever)

| Gene                       | geneID         | P-value CT | FDR CT   |
|----------------------------|----------------|------------|----------|
| <i>ENSCAFG000000001754</i> | <i>POT1</i>    | 0.00E+00   | 0.00E+00 |
| <i>ENSCAFG000000008141</i> | <i>FBXW7</i>   | 0.00E+00   | 0.00E+00 |
| <i>ENSCAFG000000018075</i> | <i>TRAF3</i>   | 0.00E+00   | 0.00E+00 |
| <i>ENSCAFG000000030674</i> | <i>FAM90A1</i> | 0.00E+00   | 0.00E+00 |

|                    |             |          |          |
|--------------------|-------------|----------|----------|
| ENSCAFG00000016714 | TP53        | 1.25E-22 | 6.11E-19 |
| ENSCAFG00000031638 | ENSCAFG000  | 2.62E-20 | 1.07E-16 |
| ENSCAFG00000014251 | DDX3X       | 7.44E-15 | 2.60E-11 |
| ENSCAFG00000001396 | PSMA1       | 4.69E-14 | 1.44E-10 |
| ENSCAFG00000017753 | RPL23A      | 2.72E-12 | 7.03E-09 |
| ENSCAFG00000030839 | PNRC1       | 2.87E-12 | 7.03E-09 |
| ENSCAFG00000013392 | SETD2       | 2.42E-11 | 5.40E-08 |
| ENSCAFG00000013774 | MAP3K14     | 1.10E-10 | 2.24E-07 |
| ENSCAFG00000000578 | FKBP3       | 3.37E-09 | 5.90E-06 |
| ENSCAFG00000025100 | TBC1D26     | 3.17E-09 | 5.90E-06 |
| ENSCAFG00000006180 | SOCS2       | 1.17E-08 | 1.91E-05 |
| ENSCAFG00000010684 | LINS        | 1.39E-08 | 2.02E-05 |
| ENSCAFG00000028928 | OR5AC1      | 1.40E-08 | 2.02E-05 |
| ENSCAFG00000025123 | FAM90A1     | 1.66E-08 | 2.26E-05 |
| ENSCAFG00000009912 | ERG         | 3.25E-08 | 4.19E-05 |
| ENSCAFG00000006036 | HNRNPA1P1(  | 1.45E-07 | 1.77E-04 |
| ENSCAFG00000009973 | EEF1A2      | 1.70E-07 | 1.98E-04 |
| ENSCAFG00000030482 | ENSCAFG000  | 7.76E-07 | 7.81E-04 |
| ENSCAFG00000028889 | USP17L2     | 7.34E-07 | 7.81E-04 |
| ENSCAFG00000029820 | ENSCAFG000  | 7.96E-07 | 7.81E-04 |
| ENSCAFG00000005151 | BRK1        | 1.02E-06 | 9.63E-04 |
| ENSCAFG00000017032 | ENSCAFG000  | 1.33E-06 | 1.21E-03 |
| ENSCAFG00000030950 | ENSCAFG000  | 2.11E-06 | 1.85E-03 |
| ENSCAFG00000013453 | KLRK1       | 2.27E-06 | 1.92E-03 |
| ENSCAFG00000003297 | LRRN3       | 2.37E-06 | 1.94E-03 |
| ENSCAFG00000014042 | KLRK1       | 3.71E-06 | 2.93E-03 |
| ENSCAFG00000019424 | PKD1        | 5.56E-06 | 4.13E-03 |
| ENSCAFG00000003796 | MAPRE1      | 5.41E-06 | 4.13E-03 |
| ENSCAFG00000000608 | ARID1B      | 6.57E-06 | 4.74E-03 |
| ENSCAFG00000015326 | SLC38A5     | 7.84E-06 | 5.27E-03 |
| ENSCAFG00000029241 | ENSCAFG000  | 8.38E-06 | 5.27E-03 |
| ENSCAFG00000014958 | RPL22       | 8.33E-06 | 5.27E-03 |
| ENSCAFG00000013551 | ATP5H       | 7.79E-06 | 5.27E-03 |
| ENSCAFG00000000749 | ENSCAFG000  | 8.30E-06 | 5.27E-03 |
| ENSCAFG00000029054 | ENSCAFG000  | 1.15E-05 | 6.88E-03 |
| ENSCAFG00000017316 | ENSCAFG000  | 1.15E-05 | 6.88E-03 |
| ENSCAFG00000016289 | CTB-167G5.5 | 1.27E-05 | 7.30E-03 |
| ENSCAFG00000029904 | HBA1        | 1.28E-05 | 7.30E-03 |
| ENSCAFG00000019962 | TAF1C       | 1.70E-05 | 9.19E-03 |
| ENSCAFG00000011598 | KPNA2       | 1.65E-05 | 9.19E-03 |
| ENSCAFG00000016528 | NTRK1       | 1.72E-05 | 9.19E-03 |
| ENSCAFG00000000595 | ENSCAFG000  | 1.99E-05 | 1.04E-02 |

|                           |                   |          |          |
|---------------------------|-------------------|----------|----------|
| <i>ENSCAFG00000032009</i> | <i>ENSCAFG000</i> | 2.20E-05 | 1.12E-02 |
| <i>ENSCAFG00000010012</i> | <i>ST13</i>       | 2.29E-05 | 1.13E-02 |
| <i>ENSCAFG00000025327</i> | <i>SOX17</i>      | 2.31E-05 | 1.13E-02 |
| <i>ENSCAFG00000006496</i> | <i>MITF</i>       | 2.39E-05 | 1.15E-02 |
| <i>ENSCAFG00000032455</i> | <i>ENSCAFG000</i> | 2.51E-05 | 1.19E-02 |
| <i>ENSCAFG00000024522</i> | <i>ENSCAFG000</i> | 2.64E-05 | 1.22E-02 |
| <i>ENSCAFG00000016251</i> | <i>EMR2</i>       | 2.89E-05 | 1.31E-02 |
| <i>ENSCAFG00000001336</i> | <i>ISCA1</i>      | 3.09E-05 | 1.38E-02 |
| <i>ENSCAFG00000017103</i> | <i>TAF1L</i>      | 3.81E-05 | 1.67E-02 |
| <i>ENSCAFG00000030845</i> | <i>HIST2H3PS2</i> | 3.95E-05 | 1.70E-02 |
| <i>ENSCAFG00000029913</i> | <i>ENSCAFG000</i> | 4.32E-05 | 1.83E-02 |
| <i>ENSCAFG00000014107</i> | <i>ENSCAFG000</i> | 4.67E-05 | 1.94E-02 |
| <i>ENSCAFG00000013060</i> | <i>PDK1</i>       | 6.39E-05 | 2.53E-02 |
| <i>ENSCAFG00000018032</i> | <i>C16orf88</i>   | 7.02E-05 | 2.73E-02 |
| <i>ENSCAFG00000017134</i> | <i>OGT</i>        | 9.24E-05 | 3.49E-02 |
| <i>ENSCAFG00000031340</i> | <i>ENSCAFG000</i> | 9.15E-05 | 3.49E-02 |
| <i>ENSCAFG00000001086</i> | <i>MYC</i>        | 9.87E-05 | 3.67E-02 |
| <i>ENSCAFG00000031200</i> | <i>ENSCAFG000</i> | 1.07E-04 | 3.91E-02 |
| <i>ENSCAFG00000014786</i> | <i>PHC3</i>       | 1.22E-04 | 4.38E-02 |
| <i>ENSCAFG00000005959</i> | <i>CWC15</i>      | 1.28E-04 | 4.53E-02 |
| <i>ENSCAFG00000006873</i> | <i>ZDHHC2</i>     | 1.32E-04 | 4.55E-02 |
| <i>ENSCAFG00000013599</i> | <i>HRG</i>        | 1.31E-04 | 4.55E-02 |
| <i>ENSCAFG00000004640</i> | <i>ENSCAFG000</i> | 1.38E-04 | 4.62E-02 |
| <i>ENSCAFG00000016403</i> | <i>GRIFIN</i>     | 1.37E-04 | 4.62E-02 |
| <i>ENSCAFG00000003493</i> | <i>ENSCAFG000</i> | 1.42E-04 | 4.69E-02 |
| <i>ENSCAFG00000024545</i> | <i>ENSCAFG000</i> | 1.55E-04 | 4.88E-02 |
| <i>ENSCAFG00000000039</i> | <i>DOK6</i>       | 1.56E-04 | 4.88E-02 |
| <i>ENSCAFG00000005185</i> | <i>XRN2</i>       | 1.59E-04 | 4.88E-02 |
| <i>ENSCAFG00000031054</i> | <i>ENSCAFG000</i> | 1.58E-04 | 4.88E-02 |
| <i>ENSCAFG00000006663</i> | <i>ENSCAFG000</i> | 1.59E-04 | 4.88E-02 |
| <i>ENSCAFG00000020326</i> | <i>DUS2L</i>      | 1.58E-04 | 4.88E-02 |

**All T-cell (boxer + golden retriever)**

| Gene                      | geneID            | P-value CT | FDR CT   |
|---------------------------|-------------------|------------|----------|
| <i>ENSCAFG00000005839</i> | <i>SATB1</i>      | 2.40E-15   | 5.88E-11 |
| <i>ENSCAFG00000025100</i> | <i>TBC1D26</i>    | 2.99E-14   | 3.67E-10 |
| <i>ENSCAFG00000001396</i> | <i>PSMA1</i>      | 1.38E-11   | 1.12E-07 |
| <i>ENSCAFG00000024399</i> | <i>COX8A</i>      | 7.06E-11   | 4.33E-07 |
| <i>ENSCAFG00000031638</i> | <i>ENSCAFG000</i> | 3.27E-09   | 1.55E-05 |
| <i>ENSCAFG00000015670</i> | <i>PTEN</i>       | 3.79E-09   | 1.55E-05 |
| <i>ENSCAFG00000006440</i> | <i>LTA4H</i>      | 2.73E-08   | 9.57E-05 |
| <i>ENSCAFG00000000584</i> | <i>ZNF706</i>     | 6.80E-08   | 2.08E-04 |

|                           |                   |          |          |
|---------------------------|-------------------|----------|----------|
| <i>ENSCAFG00000013551</i> | <i>ATP5H</i>      | 2.81E-07 | 7.67E-04 |
| <i>ENSCAFG00000029967</i> | <i>RPLP2</i>      | 9.15E-07 | 2.24E-03 |
| <i>ENSCAFG00000005019</i> | <i>GATA3</i>      | 1.33E-06 | 2.98E-03 |
| <i>ENSCAFG00000002501</i> | <i>NLRP5</i>      | 2.14E-06 | 4.37E-03 |
| <i>ENSCAFG00000014463</i> | <i>PTPN6</i>      | 2.44E-06 | 4.59E-03 |
| <i>ENSCAFG00000004229</i> | <i>GLUD2</i>      | 3.81E-06 | 5.49E-03 |
| <i>ENSCAFG00000008369</i> | <i>PBK</i>        | 3.49E-06 | 5.49E-03 |
| <i>ENSCAFG00000016310</i> | <i>IKZF3</i>      | 3.62E-06 | 5.49E-03 |
| <i>ENSCAFG00000013232</i> | <i>RPL11</i>      | 4.03E-06 | 5.49E-03 |
| <i>ENSCAFG00000017753</i> | <i>RPL23A</i>     | 7.22E-06 | 9.32E-03 |
| <i>ENSCAFG00000030674</i> | <i>FAM90A1</i>    | 8.35E-06 | 1.02E-02 |
| <i>ENSCAFG00000017298</i> | <i>MAP2K1</i>     | 1.39E-05 | 1.63E-02 |
| <i>ENSCAFG00000029913</i> | <i>ENSCAFG000</i> | 1.71E-05 | 1.90E-02 |
| <i>ENSCAFG00000019029</i> | <i>MAGEC2</i>     | 2.22E-05 | 2.26E-02 |
| <i>ENSCAFG00000002232</i> | <i>HNRNPA1L2</i>  | 2.14E-05 | 2.26E-02 |
| <i>ENSCAFG00000011017</i> | <i>KRTAP10-6</i>  | 2.33E-05 | 2.29E-02 |
