# Supplementary material for: Exome sequencing of lymphomas from three dog breeds reveals somatic mutation patterns reflecting genetic background
Source: PubMed Central journal article supplement (PMC4617960; doi:10.1101/gr.194449.115), 2015-11
Supplement: supp_gr.194449.115_Supp_Table5.pdf [file supp_gr.194449.115_Supp_Table5.pdf]

**Supplementary Table 5.** IPA-suggested canonical pathways (p<0.05) for significantly mutated genes from T-cell lymphomas from boxer and golden retriever

**Boxer**

|                                                                 | p-value  | Ratio    | Genes       |
|-----------------------------------------------------------------|----------|----------|-------------|
| Ingenuity Canonical Pathways                                    |          |          |             |
| Melanoma Signaling                                              | 6.31E-05 | 4.76E-02 | MAP2K1,PTEN |
| Endometrial Cancer Signaling                                    | 9.77E-05 | 3.85E-02 | MAP2K1,PTEN |
| ErbB2-ErbB3 Signaling                                           | 1.17E-04 | 3.51E-02 | MAP2K1,PTEN |
| IL-17A Signaling in Airway Cells                                | 1.48E-04 | 3.12E-02 | MAP2K1,PTEN |
| Prostate Cancer Signaling                                       | 2.45E-04 | 2.44E-02 | MAP2K1,PTEN |
| FAK Signaling                                                   | 2.75E-04 | 2.30E-02 | MAP2K1,PTEN |
| Neuregulin Signaling                                            | 2.82E-04 | 2.27E-02 | MAP2K1,PTEN |
| Glioma Signaling                                                | 3.31E-04 | 2.11E-02 | MAP2K1,PTEN |
| PTEN Signaling                                                  | 5.01E-04 | 1.69E-02 | MAP2K1,PTEN |
| PI3K/AKT Signaling                                              | 5.50E-04 | 1.63E-02 | MAP2K1,PTEN |
| PI3K Signaling in B Lymphocytes                                 | 5.89E-04 | 1.56E-02 | MAP2K1,PTEN |
| Ovarian Cancer Signaling                                        | 6.17E-04 | 1.53E-02 | MAP2K1,PTEN |
| Insulin Receptor Signaling                                      | 6.46E-04 | 1.49E-02 | MAP2K1,PTEN |
| Glioblastoma Multiforme Signaling                               | 7.76E-04 | 1.37E-02 | MAP2K1,PTEN |
| RAR Activation                                                  | 1.12E-03 | 1.14E-02 | MAP2K1,PTEN |
| B Cell Receptor Signaling                                       | 1.12E-03 | 1.14E-02 | MAP2K1,PTEN |
| Sertoli Cell-Sertoli Cell Junction Signaling                    | 1.15E-03 | 1.12E-02 | MAP2K1,PTEN |
| Integrin Signaling                                              | 1.48E-03 | 9.90E-03 | MAP2K1,PTEN |
| Protein Kinase A Signaling                                      | 5.25E-03 | 5.18E-03 | MAP2K1,PTEN |
| D-myo-inositol (1,3,4)-trisphosphate Biosynthesis               | 5.62E-03 | 5.26E-02 | PTEN        |
| Superpathway of D-myo-inositol (1,4,5)-trisphosphate Metabolism | 7.08E-03 | 4.17E-02 | PTEN        |
| 4-1BB Signaling in T Lymphocytes                                | 9.12E-03 | 3.23E-02 | MAP2K1      |
| Oncostatin M Signaling                                          | 1.00E-02 | 2.94E-02 | MAP2K1      |
| Thyroid Cancer Signaling                                        | 1.20E-02 | 2.50E-02 | MAP2K1      |
| UVC-Induced MAPK Signaling                                      | 1.26E-02 | 2.38E-02 | MAP2K1      |
| Role of IL-17F in Allergic Inflammatory Airway Diseases         | 1.32E-02 | 2.27E-02 | MAP2K1      |
| CD27 Signaling in Lymphocytes                                   | 1.55E-02 | 1.92E-02 | MAP2K1      |
| CNTF Signaling                                                  | 1.55E-02 | 1.92E-02 | MAP2K1      |
| UVB-Induced MAPK Signaling                                      | 1.58E-02 | 1.89E-02 | MAP2K1      |
| IL-2 Signaling                                                  | 1.58E-02 | 1.89E-02 | MAP2K1      |
| Role of IL-17A in Arthritis                                     | 1.58E-02 | 1.85E-02 | MAP2K1      |
| Thrombopoietin Signaling                                        | 1.62E-02 | 1.82E-02 | MAP2K1      |
| EGF Signaling                                                   | 1.66E-02 | 1.79E-02 | MAP2K1      |
| ErbB4 Signaling                                                 | 1.78E-02 | 1.67E-02 | MAP2K1      |
| GM-CSF Signaling                                                | 1.82E-02 | 1.61E-02 | MAP2K1      |
| Antiproliferative Role of Somatostatin Receptor 2               | 1.86E-02 | 1.59E-02 | MAP2K1      |
| Pyridoxal 5'-phosphate Salvage Pathway                          | 1.91E-02 | 1.56E-02 | MAP2K1      |

|                                                                      |          |          |        |
|----------------------------------------------------------------------|----------|----------|--------|
| CD40 Signaling                                                       | 1.91E-02 | 1.54E-02 | MAP2K1 |
| Non-Small Cell Lung Cancer Signaling                                 | 1.91E-02 | 1.54E-02 | MAP2K1 |
| Hypoxia Signaling in the Cardiovascular System                       | 1.91E-02 | 1.54E-02 | PTEN   |
| IL-15 Signaling                                                      | 1.95E-02 | 1.52E-02 | MAP2K1 |
| Role of PI3K/AKT Signaling in the Pathogenesis of Influenza          | 1.95E-02 | 1.52E-02 | MAP2K1 |
| Erythropoietin Signaling                                             | 2.00E-02 | 1.49E-02 | MAP2K1 |
| Neurotrophin/TRK Signaling                                           | 2.00E-02 | 1.49E-02 | MAP2K1 |
| Role of MAPK Signaling in the Pathogenesis of Influenza              | 2.00E-02 | 1.47E-02 | MAP2K1 |
| GDNF Family Ligand-Receptor Interactions                             | 2.00E-02 | 1.47E-02 | MAP2K1 |
| Melatonin Signaling                                                  | 2.09E-02 | 1.43E-02 | MAP2K1 |
| IL-3 Signaling                                                       | 2.09E-02 | 1.41E-02 | MAP2K1 |
| Renal Cell Carcinoma Signaling                                       | 2.09E-02 | 1.41E-02 | MAP2K1 |
| Small Cell Lung Cancer Signaling                                     | 2.09E-02 | 1.41E-02 | PTEN   |
| Chemokine Signaling                                                  | 2.09E-02 | 1.41E-02 | MAP2K1 |
| IL-17 Signaling                                                      | 2.14E-02 | 1.39E-02 | MAP2K1 |
| JAK/Stat Signaling                                                   | 2.14E-02 | 1.39E-02 | MAP2K1 |
| LPS-stimulated MAPK Signaling                                        | 2.14E-02 | 1.37E-02 | MAP2K1 |
| Prolactin Signaling                                                  | 2.14E-02 | 1.37E-02 | MAP2K1 |
| STAT3 Pathway                                                        | 2.14E-02 | 1.37E-02 | MAP2K1 |
| FLT3 Signaling in Hematopoietic Progenitor Cells                     | 2.19E-02 | 1.35E-02 | MAP2K1 |
| Leptin Signaling in Obesity                                          | 2.19E-02 | 1.35E-02 | MAP2K1 |
| TREM1 Signaling                                                      | 2.24E-02 | 1.33E-02 | NLRP14 |
| VEGF Family Ligand-Receptor Interactions                             | 2.24E-02 | 1.32E-02 | MAP2K1 |
| BMP signaling pathway                                                | 2.24E-02 | 1.32E-02 | MAP2K1 |
| Acute Myeloid Leukemia Signaling                                     | 2.29E-02 | 1.30E-02 | MAP2K1 |
| PDGF Signaling                                                       | 2.29E-02 | 1.30E-02 | MAP2K1 |
| Regulation of IL-2 Expression in Activated and Anergic T Lymphocytes | 2.34E-02 | 1.27E-02 | MAP2K1 |
| Ceramide Signaling                                                   | 2.34E-02 | 1.25E-02 | MAP2K1 |
| Melanocyte Development and Pigmentation Signaling                    | 2.45E-02 | 1.19E-02 | MAP2K1 |
| FGF Signaling                                                        | 2.51E-02 | 1.18E-02 | MAP2K1 |
| ErbB Signaling                                                       | 2.51E-02 | 1.16E-02 | MAP2K1 |
| $\alpha$ -Adrenergic Signaling                                       | 2.57E-02 | 1.15E-02 | MAP2K1 |
| Bladder Cancer Signaling                                             | 2.57E-02 | 1.15E-02 | MAP2K1 |
| TGF- $\beta$ Signaling                                               | 2.57E-02 | 1.15E-02 | MAP2K1 |
| RANK Signaling in Osteoclasts                                        | 2.57E-02 | 1.14E-02 | MAP2K1 |
| PAK Signaling                                                        | 2.63E-02 | 1.12E-02 | MAP2K1 |
| Apoptosis Signaling                                                  | 2.63E-02 | 1.12E-02 | MAP2K1 |
| VEGF Signaling                                                       | 2.69E-02 | 1.10E-02 | MAP2K1 |

|                                                                 |          |          |               |
|-----------------------------------------------------------------|----------|----------|---------------|
| Fcγ Receptor-mediated Phagocytosis in Macrophages and Monocytes | 2.75E-02 | 1.08E-02 | <i>PTEN</i>   |
| Chronic Myeloid Leukemia Signaling                              | 2.75E-02 | 1.08E-02 | <i>MAP2K1</i> |
| PPAR Signaling                                                  | 2.75E-02 | 1.06E-02 | <i>MAP2K1</i> |
| Mouse Embryonic Stem Cell Pluripotency                          | 2.82E-02 | 1.05E-02 | <i>MAP2K1</i> |
| Salvage Pathways of Pyrimidine Ribonucleotides                  | 2.82E-02 | 1.05E-02 | <i>MAP2K1</i> |
| IGF-1 Signaling                                                 | 2.88E-02 | 1.03E-02 | <i>MAP2K1</i> |
| T Cell Receptor Signaling                                       | 2.88E-02 | 1.03E-02 | <i>MAP2K1</i> |
| p53 Signaling                                                   | 2.88E-02 | 1.02E-02 | <i>PTEN</i>   |
| CDK5 Signaling                                                  | 2.95E-02 | 1.01E-02 | <i>MAP2K1</i> |
| Telomerase Signaling                                            | 2.95E-02 | 1.01E-02 | <i>MAP2K1</i> |
| Nitric Oxide Signaling in the Cardiovascular System             | 2.95E-02 | 1.01E-02 | <i>MAP2K1</i> |
| Cholecystokinin/Gastrin-mediated Signaling                      | 2.95E-02 | 9.90E-03 | <i>MAP2K1</i> |
| Rac Signaling                                                   | 3.09E-02 | 9.62E-03 | <i>MAP2K1</i> |
| HGF Signaling                                                   | 3.09E-02 | 9.52E-03 | <i>MAP2K1</i> |
| Pancreatic Adenocarcinoma Signaling                             | 3.09E-02 | 9.43E-03 | <i>MAP2K1</i> |
| NGF Signaling                                                   | 3.16E-02 | 9.35E-03 | <i>MAP2K1</i> |
| fMLP Signaling in Neutrophils                                   | 3.16E-02 | 9.26E-03 | <i>MAP2K1</i> |
| iCOS-iCOSL Signaling in T Helper Cells                          | 3.16E-02 | 9.26E-03 | <i>PTEN</i>   |
| Fc Epsilon RI Signaling                                         | 3.24E-02 | 9.17E-03 | <i>MAP2K1</i> |
| Renin-Angiotensin Signaling                                     | 3.24E-02 | 9.17E-03 | <i>MAP2K1</i> |
| Gαs Signaling                                                   | 3.24E-02 | 9.17E-03 | <i>MAP2K1</i> |
| Natural Killer Cell Signaling                                   | 3.24E-02 | 9.09E-03 | <i>MAP2K1</i> |
| Role of Tissue Factor in Cancer                                 | 3.24E-02 | 9.09E-03 | <i>PTEN</i>   |
| Corticotropin Releasing Hormone Signaling                       | 3.24E-02 | 9.01E-03 | <i>MAP2K1</i> |
| Role of NANOG in Mammalian Embryonic Stem Cell Pluripotency     | 3.24E-02 | 9.01E-03 | <i>MAP2K1</i> |
| Hereditary Breast Cancer Signaling                              | 3.39E-02 | 8.70E-03 | <i>PTEN</i>   |
| IL-6 Signaling                                                  | 3.39E-02 | 8.62E-03 | <i>MAP2K1</i> |
| 14-3-3-mediated Signaling                                       | 3.47E-02 | 8.55E-03 | <i>MAP2K1</i> |
| CCR3 Signaling in Eosinophils                                   | 3.47E-02 | 8.55E-03 | <i>MAP2K1</i> |
| Gα12/13 Signaling                                               | 3.47E-02 | 8.55E-03 | <i>MAP2K1</i> |
| CD28 Signaling in T Helper Cells                                | 3.47E-02 | 8.47E-03 | <i>MAP2K1</i> |
| Synaptic Long Term Potentiation                                 | 3.47E-02 | 8.40E-03 | <i>MAP2K1</i> |
| p70S6K Signaling                                                | 3.47E-02 | 8.40E-03 | <i>MAP2K1</i> |
| P2Y Purigenic Receptor Signaling Pathway                        | 3.47E-02 | 8.40E-03 | <i>MAP2K1</i> |
| HMGB1 Signaling                                                 | 3.55E-02 | 8.33E-03 | <i>MAP2K1</i> |
| D-myo-inositol (1,4,5,6)-Tetrakisphosphate Biosynthesis         | 3.72E-02 | 7.87E-03 | <i>PTEN</i>   |
| D-myo-inositol (3,4,5,6)-tetrakisphosphate Biosynthesis         | 3.72E-02 | 7.87E-03 | <i>PTEN</i>   |

|                                               |          |          |        |
|-----------------------------------------------|----------|----------|--------|
| Estrogen Receptor Signaling                   | 3.72E-02 | 7.87E-03 | MAP2K1 |
| GNRH Signaling                                | 3.80E-02 | 7.75E-03 | MAP2K1 |
| IL-12 Signaling and Production in Macrophages | 3.98E-02 | 7.41E-03 | MAP2K1 |
| Relaxin Signaling                             | 3.98E-02 | 7.41E-03 | MAP2K1 |
| Synaptic Long Term Depression                 | 4.17E-02 | 7.09E-03 | MAP2K1 |
| D-myo-inositol-5-phosphate Metabolism         | 4.17E-02 | 6.99E-03 | PTEN   |
| 3-phosphoinositide Degradation                | 4.27E-02 | 6.94E-03 | PTEN   |
| Regulation of eIF4 and p70S6K Signaling       | 4.27E-02 | 6.85E-03 | MAP2K1 |
| Epithelial Adherens Junction Signaling        | 4.27E-02 | 6.85E-03 | PTEN   |
| Gαq Signaling                                 | 4.27E-02 | 6.80E-03 | MAP2K1 |
| CXCR4 Signaling                               | 4.47E-02 | 6.58E-03 | MAP2K1 |
| Aldosterone Signaling in Epithelial Cells     | 4.47E-02 | 6.58E-03 | MAP2K1 |
| Gap Junction Signaling                        | 4.57E-02 | 6.45E-03 | MAP2K1 |
| 3-phosphoinositide Biosynthesis               | 4.57E-02 | 6.45E-03 | PTEN   |
| Germ Cell-Sertoli Cell Junction Signaling     | 4.68E-02 | 6.25E-03 | MAP2K1 |
| Tight Junction Signaling                      | 4.90E-02 | 5.99E-03 | PTEN   |
| Acute Phase Response Signaling                | 4.90E-02 | 5.92E-03 | MAP2K1 |

### Golden retriever

|                                                        | p-value  | Ratio    | Genes        |
|--------------------------------------------------------|----------|----------|--------------|
| Ingenuity Canonical Pathways                           |          |          |              |
| Glutamate Biosynthesis II                              | 1.70E-03 | 5.00E-01 | GLUD2        |
| Glutamate Degradation X                                | 1.70E-03 | 5.00E-01 | GLUD2        |
| Oxidative Phosphorylation                              | 3.80E-03 | 1.83E-02 | ATP5H,COX8A  |
| Arginine Biosynthesis IV                               | 5.01E-03 | 1.67E-01 | GLUD2        |
| Mitochondrial Dysfunction                              | 8.91E-03 | 1.17E-02 | ATP5H,COX8A  |
| EIF2 Signaling                                         | 1.05E-02 | 1.08E-02 | RPL11,RPL23A |
| Leukotriene Biosynthesis                               | 1.26E-02 | 6.67E-02 | LTA4H        |
| Pyrimidine Deoxyribonucleotides De Novo Biosynthesis I | 1.86E-02 | 4.55E-02 | NME7         |
| Protein Ubiquitination Pathway                         | 1.91E-02 | 7.84E-03 | FBXW7,PSMA1  |
| Role of JAK1, JAK2 and TYK2 in Interferon Signaling    | 2.00E-02 | 4.17E-02 | PTPN6        |
| Pyrimidine Ribonucleotides Interconversion             | 2.24E-02 | 3.70E-02 | NME7         |
| Pyrimidine Ribonucleotides De Novo Biosynthesis        | 2.40E-02 | 3.45E-02 | NME7         |
| Role of JAK2 in Hormone-like Cytokine Signaling        | 2.95E-02 | 2.86E-02 | PTPN6        |
