# Supplementary material for: Exome sequencing of lymphomas from three dog breeds reveals somatic mutation patterns reflecting genetic background
Source: PubMed Central journal article supplement (PMC4617960; doi:10.1101/gr.194449.115), 2015-11
Supplement: supp_gr.194449.115_Supp_Table7.pdf [file supp_gr.194449.115_Supp_Table7.pdf]

**Supplementary Table 7.** Networks suggested by IPA for significantly mutated genes from B-cell lymphomas from cocker spaniel and golden retriever

**Cocker spaniel**

| Network ID | Molecules in Network                                                                                                                                                                                                                     | Score | Focus Molecules | Top Diseases and Functions                       |
|------------|------------------------------------------------------------------------------------------------------------------------------------------------------------------------------------------------------------------------------------------|-------|-----------------|--------------------------------------------------|
| 1          | Akt,APP,CAPRIN1,caspase,DDX3X,EDA,EIF1AX,FAM90A1,FFAR2,GAPDHS,GNPTAB,GPM6B,GYG2,Igm,INPP4B,MITF,MYC,P38 MAPK,PABPN1,PLBD1,POT1,PPFIBP2,PSMA1,RAD51C,SLC19A2,ST3GAL6,TBKBP1,TMCC2,TNFRSF13C,TRAF3,TRAF4,TRAF1-TRAF2-TRAF3,UBL3,USP48,Vegf | 20    | 7               | Cell Morphology, Cancer, Cell Death and Survival |

**Golden retriever**

| Network ID | Molecules in Network                                                                                                                                                                                                                                                                  | Score | Focus Molecules | Top Diseases and Functions                                                      |
|------------|---------------------------------------------------------------------------------------------------------------------------------------------------------------------------------------------------------------------------------------------------------------------------------------|-------|-----------------|---------------------------------------------------------------------------------|
| 1          | 26s<br>Proteasome,Actin,Ap1,DDX3X,EEF1A1,EEF1A2,ERG,ERK1/2,GLUD1,HBA1/HBA2,Hsp70,IFN Beta,IgG2a,Igm,Ikb,Immunoglobulin,Insulin,KLRC4-KLRK1/KLRK1,MAP3K14,MDH2,NTRK1,p70 S6k,p85 (pik3r),PDIA6,PKD1,PI3K (complex),PKD1,PNRC1,Ras,RPL22,RPL23A,Sos,thyroid hormone receptor,TRAF3,XRN2 | 43    | 18              | Cellular Development, Tissue Development, Protein Synthesis                     |
| 2          | ANKMY2,APP,ATP5H,BAI3,C12orf5,CFAP58,CPED1,CWC15,CYP4F11,DUS2,EMR2,ETS1,FAM90A1,GPR52,HOMEZ,IL6,ISYNA1,KIAA1191,KNOP1,LINS,MAPRE1,PHC3,PHYHD1,PLBD1,POT1,PROSER2,SUMO2,SYAP1,UBC,UBL3,USP17L2 (includes others),WDR17,ZBED2,ZDHHC2,ZNF486                                             | 30    | 14              | Cell-To-Cell Signaling and Interaction, Tissue Development, Cellular Compromise |

|   |                                                                                                                                                                                                                                                                                                                                                                                                                                                                                                   |    |    |                                        |
|---|---------------------------------------------------------------------------------------------------------------------------------------------------------------------------------------------------------------------------------------------------------------------------------------------------------------------------------------------------------------------------------------------------------------------------------------------------------------------------------------------------|----|----|----------------------------------------|
| 3 | Akt, BRK1, caspase, CD3, Ck2, Creb, DR4/5, ERK, FBXW7, FKBP3, Histone h3, HNRNPA1L2, Hsp90, Jnk, Jnk dimer, KPNA2, miR-17-3p (and other miRNAs w/seed CUGCAGU), miR-191-5p (and other miRNAs w/seed AACGGAA), MIR155HG, NFkB (complex), P38 MAPK, Pkc(s), PRELID1, PSMA1, RNA polymerase II, SETD2, SOCS2, SOX17, ST13, TAF1C, TP53, TRAF1-TRAF2-TRAF3, TRIAP1, Vegf, ZNF385A<br>AICAR, APH1A, APLP2, BUB3, CD47, DOK2, DOK6, DYRK1A, E2F2, EGFR, ELAVL1, EPHA2, FKBP1A, HCFC1, HTATIP2, IGF2BP3, | 24 | 12 | Cancer, Cell Cycle, Cell Morphology    |
| 4 | ISCA1, mir-15, MYBL2, PDCD6IP, PEX19, PHLDA1, PPP2R2A, PPP6C, RALA, RHOB, RNF41, RPN1, SCAMP1, SERPINE2, SGPL1, SH2D1A, TUBB3, UBE2L3, YES1                                                                                                                                                                                                                                                                                                                                                       | 5  | 3  | Cancer, Cell Cycle, Infectious Disease |

### Combined dataset (cocker spaniel + golden retriever)

| Network ID | Molecules in Network                                                                                                                                                                                                                                                                                                             | Score | Focus Molecules | Top Diseases and Functions                                  |
|------------|----------------------------------------------------------------------------------------------------------------------------------------------------------------------------------------------------------------------------------------------------------------------------------------------------------------------------------|-------|-----------------|-------------------------------------------------------------|
| 1          | 26s Proteasome, 60S ribosomal subunit, Akt, caspase, Cg, Ck2, DDX3X, ERG, FBXW7, Hdac, HISTONE, Histone h3, HNRNPA1L2, HRG, Hsp70, Hsp90, Immunoglobulin, KPNA2, MAP3K14, MYC, NFkB (complex), POT1, PPP6C, PSMA1, RNA polymerase II, RPL22, RPL23A, SETD2, ST13, TAF1C, TAF1L, TP53, Ubiquitin, USP17L2 (includes others), XRN2 | 45    | 20              | Cancer, Hematological Disease, Immunological Disease        |
| 2          | Ap1, BRK1, Cbp/p300, CD3, Creb, Cyclin E, EEF1A2, ERK1/2, FKBP3, Growth hormone, HBA1/HBA2, IFN Beta, Ige, IgG, IgG2a, Igm, Ikb, IL1, IL12 (complex), Interferon alpha, KLRC4-KLRK1/KLRK1, Mek, MITF, NTRK1, OGT, p85 (pik3r), PDK1, PNRC1, Ras, SOCS2, Sos, SOX17, TCR, thyroid hormone receptor, TRAF3                         | 28    | 13              | Cellular Movement, Cellular Development, Tissue Development |

|   |                                                                                                                                                                                                                                                                                                             |    |    |                                                                                 |
|---|-------------------------------------------------------------------------------------------------------------------------------------------------------------------------------------------------------------------------------------------------------------------------------------------------------------|----|----|---------------------------------------------------------------------------------|
| 3 | <p>APBB2,APOBEC3C,APP,ARID1B,ATL3,ATP5H,BAI3,C12orf5,<br/>CWC15,DOK6,DUS2,EGFR,ELAVL1,EMR2,FAM90A1,GPD1L,<br/>ISCA1,LETMD1,LINGO1,LINS,MAPRE1,MBNL2,MIS18BP1,<br/>MPI,MPV17L,MRPL24,PHC3,PLBD1,SLC38A5,SUMF2,<br/>TMED7,TMEM127,UBC,UBL3,ZDHHC2</p>                                                         | 27 | 13 | Developmental Disorder, Hereditary Disorder,<br>Neurological Disease            |
| 4 | <p>ARHGAP1,Cg,DHCR24,ELK3,ELK4,ERK,FGFBP1,GAS6,GPR34,<br/>Gsk3,indican,iodine,Jnk,K Channel,KNOP1,LRRN3,MAP3K4,<br/>Mapk,MAPK4,mir-101,miR-199a-3p (and other miRNAs<br/>w/seed CAGUAGU),MKK3/6,NCF4,P38 MAPK,PADI2,PI3K<br/>(complex),Pkc(s),PKD1,PODXL,Rac,TLR6,TRAF1-TRAF2-<br/>TRAF3,TRIO,Vegf,VRK2</p> | 5  | 3  | Cellular Development, Cellular Growth and<br>Proliferation, Renal Proliferation |
