# Supplementary material for: Exome sequencing of lymphomas from three dog breeds reveals somatic mutation patterns reflecting genetic background
Source: PubMed Central journal article supplement (PMC4617960; doi:10.1101/gr.194449.115), 2015-11
Supplement: supp_gr.194449.115_Supp_Table8.pdf [file supp_gr.194449.115_Supp_Table8.pdf]

**Supplementary Table 8.** Functional annotation charts from DAVID analysis of top significantly mutated genes (if more than 15 significantly mutated genes, only the top 15 genes were used since DAVID does not take p-values)

**Cocker spaniel B-cell lymphoma**

| Category | Term            | Description | % input genes implicated                                                                     | p-value | List Total | Pop Hits | Pop Total |       |
|----------|-----------------|-------------|----------------------------------------------------------------------------------------------|---------|------------|----------|-----------|-------|
| 1        | GOTERM_BP_FAT   | GO0010604   | positive regulation of macromolecule metabolic process                                       | 57.1    | 9.66E-04   | 5        | 857       | 13528 |
| 2        | GOTERM_BP_FAT   | GO0032204   | regulation of telomere maintenance                                                           | 28.6    | 3.54E-03   | 5        | 12        | 13528 |
| 3        | GOTERM_BP_FAT   | GO0043085   | positive regulation of catalytic activity                                                    | 42.9    | 8.40E-03   | 5        | 520       | 13528 |
| 4        | GOTERM_BP_FAT   | GO0033044   | regulation of chromosome organization                                                        | 28.6    | 8.84E-03   | 5        | 30        | 13528 |
| 5        | GOTERM_BP_FAT   | GO0044093   | positive regulation of molecular function                                                    | 42.9    | 1.06E-02   | 5        | 586       | 13528 |
| 6        | GOTERM_BP_FAT   | GO0045935   | positive regulation of nucleobase, nucleoside, nucleotide and nucleic acid metabolic process | 42.9    | 1.20E-02   | 5        | 624       | 13528 |
| 7        | GOTERM_BP_FAT   | GO0051173   | positive regulation of nitrogen compound metabolic process                                   | 42.9    | 1.27E-02   | 5        | 644       | 13528 |
| 8        | GOTERM_BP_FAT   | GO0010557   | positive regulation of macromolecule biosynthetic process                                    | 42.9    | 1.31E-02   | 5        | 654       | 13528 |
| 9        | GOTERM_CC_FAT   | GO0005654   | nucleoplasm                                                                                  | 42.9    | 1.36E-02   | 4        | 882       | 12782 |
| 10       | GOTERM_BP_FAT   | GO0031328   | positive regulation of cellular biosynthetic process                                         | 42.9    | 1.43E-02   | 5        | 685       | 13528 |
| 11       | SP_PIR_KEYWORDS | dna-binding |                                                                                              | 57.1    | 1.46E-02   | 7        | 1868      | 19235 |
| 12       | GOTERM_BP_FAT   | GO0009891   | positive regulation of biosynthetic process                                                  | 42.9    | 1.48E-02   | 5        | 695       | 13528 |
| 13       | GOTERM_BP_FAT   | GO0010605   | negative regulation of macromolecular metabolic process                                      | 42.9    | 1.64E-02   | 5        | 734       | 13528 |

|    |                 |                       |                                                    |      |          |   |      |       |
|----|-----------------|-----------------------|----------------------------------------------------|------|----------|---|------|-------|
| 14 | GOTERM_BP_FAT   | GO0043473             | pigmentation                                       | 28.6 | 1.73E-02 | 5 | 59   | 13528 |
| 15 | GOTERM_BP_FAT   | GO0042981             | regulation of apoptosis                            | 42.9 | 1.95E-02 | 5 | 804  | 13528 |
| 16 | GOTERM_BP_FAT   | GO0043067             | regulation of programmed cell death                | 42.9 | 1.99E-02 | 5 | 812  | 13528 |
| 17 | GOTERM_BP_FAT   | GO0010941             | regulation of cell death                           | 42.9 | 2.00E-02 | 5 | 815  | 13528 |
| 18 | KEGG_PATHWAY    | hsa05200              | Pathways in cancer                                 | 42.9 | 2.28E-02 | 5 | 328  | 5085  |
| 19 | SP_PIR_KEYWORDS | nucleus               |                                                    | 71.4 | 2.49E-02 | 7 | 4283 | 19235 |
| 20 | GOTERM_MF_FAT   | GO0043565             | sequence-specific DNA binding                      | 42.9 | 2.89E-02 | 7 | 607  | 12983 |
| 21 | GOTERM_BP_FAT   | GO0051052             | regulation of Dna metabolic process                | 28.6 | 3.33E-02 | 5 | 114  | 13528 |
| 22 | GOTERM_BP_FAT   | GO0032844             | regulation of homeostatic process                  | 28.6 | 3.33E-02 | 5 | 114  | 13528 |
| 23 | UP_SEQ_FEATURE  | domain                | Leucine-zipper                                     | 28.6 | 3.40E-02 | 7 | 110  | 19113 |
| 24 | UP_SEQ_FEATURE  | domain                | Helix-loop-helix motif                             | 28.6 | 3.53E-02 | 7 | 114  | 19113 |
| 25 | GOTERM_CC_FAT   | GO0031981             | nuclear lumen                                      | 42.9 | 3.57E-02 | 4 | 1450 | 12782 |
| 26 | GOTERM_CC_FAT   | GO0016604             | nuclear body                                       | 28.6 | 3.89E-02 | 4 | 168  | 12782 |
| 27 | INTERPRO        | IPR001092             | Basic helix-loop-helix dimerisation region<br>bHLH | 28.6 | 4.04E-02 | 7 | 114  | 16659 |
| 28 | SMART           | SM00353               | HLH                                                | 28.6 | 4.93E-02 | 5 | 114  | 9079  |
| 29 | UP_SEQ_FEATURE  | DNA-binding<br>region | Basic motif                                        | 28.6 | 4.95E-02 | 7 | 161  | 19113 |
| 30 | GOTERM_BP_FAT   | GO0051345             | positive regulation of hydrolase activity          | 28.6 | 5.19E-02 | 5 | 179  | 13528 |
| 31 | GOTERM_CC_FAT   | GO0070013             | intracellular organelle lumen                      | 42.9 | 5.27E-02 | 4 | 1779 | 12782 |
| 32 | KEGG_PATHWAY    | hsa04622              | RIG-I-like receptor signaling pathway              | 28.6 | 5.47E-02 | 5 | 71   | 5085  |
| 33 | GOTERM_CC_FAT   | GO0043233             | organelle lumen                                    | 42.9 | 5.50E-02 | 4 | 1820 | 12782 |
| 34 | GOTERM_CC_FAT   | GO0031974             | membrane-enclosed lumen                            | 42.9 | 5.71E-02 | 4 | 1856 | 12782 |
| 35 | GOTERM_BP_FAT   | GO0033043             | regulation of organelle organization               | 28.6 | 6.26E-02 | 5 | 217  | 13528 |
| 36 | KEGG_PATHWAY    | hsa05222              | Small cell lung cancer                             | 28.6 | 6.45E-02 | 5 | 84   | 5085  |
| 37 | GOTERM_MF_FAT   | GO0043566             | structure-specific DNA binding                     | 28.6 | 6.52E-02 | 7 | 145  | 12983 |

|    |                 |                 |                                           |      |          |   |      |       |
|----|-----------------|-----------------|-------------------------------------------|------|----------|---|------|-------|
| 38 | GOTERM_BP_FAT   | GO0007423       | sensory organ development                 | 28.6 | 6.60E-02 | 5 | 229  | 13528 |
| 39 | GOTERM_MF_FAT   | GO0003677       | DNA binding                               | 57.1 | 7.53E-02 | 7 | 2331 | 12983 |
| 40 | GOTERM_BP_FAT   | GO0043086       | negative regulation of catalytic activity | 28.6 | 7.94E-02 | 5 | 277  | 13528 |
| 41 | GOTERM_BP_FAT   | GO0006917       | induction of apoptosis                    | 28.6 | 9.13E-02 | 5 | 320  | 13528 |
| 42 | GOTERM_BP_FAT   | GO0012502       | induction of programmed cell death        | 28.6 | 9.16E-02 | 5 | 321  | 13528 |
| 43 | GOTERM_BP_FAT   | GO0044092       | negative regulation of molecular function | 28.6 | 9.52E-02 | 5 | 334  | 13528 |
| 44 | SP_PIR_KEYWORDS | isopeptide bond |                                           | 28.6 | 9.55E-02 | 7 | 319  | 19235 |
| 45 | GOTERM_BP_FAT   | GO0051336       | regulation of hydrolase activity          | 28.6 | 9.60E-02 | 5 | 337  | 13528 |

**Cocker spaniel B-cell lymphoma, continued**

| Category | Term          | Fold Enrichment | Bonferroni | Benjamini | FDR   | Genes                                                          |
|----------|---------------|-----------------|------------|-----------|-------|----------------------------------------------------------------|
| 1        | GOTERM_BP_FAT | 12.63           | 0.19       | 0.19      | 1.22  | ENSG00000136997,ENSG00000187098,ENSG0000129084,ENSG00000128513 |
| 2        | GOTERM_BP_FAT | 450.93          | 0.55       | 0.33      | 4.42  | ENSG00000136997,ENSG00000128513                                |
| 3        | GOTERM_BP_FAT | 15.61           | 0.85       | 0.46      | 10.20 | ENSG00000136997,ENSG00000129084,ENSG0000128513                 |
| 4        | GOTERM_BP_FAT | 180.37          | 0.86       | 0.39      | 10.70 | ENSG00000136997,ENSG00000128513                                |
| 5        | GOTERM_BP_FAT | 13.85           | 0.91       | 0.38      | 12.71 | ENSG00000136997,ENSG00000129084,ENSG0000128513                 |
| 6        | GOTERM_BP_FAT | 13.01           | 0.93       | 0.36      | 14.24 | ENSG00000136997,ENSG00000187098,ENSG0000128513                 |
| 7        | GOTERM_BP_FAT | 12.60           | 0.94       | 0.33      | 15.07 | ENSG00000136997,ENSG00000187098,ENSG0000128513                 |

|    |                 |             |       |      |      |       |                                                                                |
|----|-----------------|-------------|-------|------|------|-------|--------------------------------------------------------------------------------|
| 8  | GOTERM_BP_FAT   | GO0010557   | 12.41 | 0.95 | 0.31 | 15.49 | ENSG00000136997,ENSG00000187098,ENSG0000128513                                 |
| 9  | GOTERM_CC_FAT   | GO0005654   | 10.87 | 0.33 | 0.33 | 10.93 | ENSG00000215301,ENSG00000136997,ENSG0000128513                                 |
| 10 | GOTERM_BP_FAT   | GO0031328   | 11.85 | 0.96 | 0.30 | 16.83 | ENSG00000136997,ENSG00000187098,ENSG0000128513                                 |
| 11 | SP_PIR_KEYWORDS | dna-binding | 5.88  | 0.44 | 0.44 | 12.59 | ENSG00000215301,ENSG00000136997,ENSG0000187098,ENSG00000128513                 |
| 12 | GOTERM_BP_FAT   | GO0009891   | 11.68 | 0.96 | 0.28 | 17.26 | ENSG00000136997,ENSG00000187098,ENSG0000128513                                 |
| 13 | GOTERM_BP_FAT   | GO0010605   | 11.06 | 0.97 | 0.28 | 19.00 | ENSG00000136997,ENSG00000129084,ENSG0000128513                                 |
| 14 | GOTERM_BP_FAT   | GO0043473   | 91.72 | 0.98 | 0.28 | 19.98 | ENSG00000136997,ENSG00000187098                                                |
| 15 | GOTERM_BP_FAT   | GO0042981   | 10.10 | 0.99 | 0.29 | 22.23 | ENSG00000136997,ENSG00000187098,ENSG0000131323                                 |
| 16 | GOTERM_BP_FAT   | GO0043067   | 10.00 | 0.99 | 0.27 | 22.61 | ENSG00000136997,ENSG00000187098,ENSG0000131323                                 |
| 17 | GOTERM_BP_FAT   | GO0010941   | 9.96  | 0.99 | 0.26 | 22.75 | ENSG00000136997,ENSG00000187098,ENSG0000131323                                 |
| 18 | KEGG_PATHWAY    | hsa05200    | 9.30  | 0.36 | 0.36 | 15.88 | ENSG00000136997,ENSG00000187098,ENSG0000131323                                 |
| 19 | SP_PIR_KEYWORDS | nucleus     | 3.21  | 0.64 | 0.40 | 20.63 | ENSG00000215301,ENSG00000136997,ENSG0000187098,ENSG00000129084,ENSG00000128513 |
| 20 | GOTERM_MF_FAT   | GO0043565   | 9.17  | 0.73 | 0.73 | 24.09 | ENSG00000136997,ENSG00000187098,ENSG0000128513                                 |
| 21 | GOTERM_BP_FAT   | GO0051052   | 47.47 | 1.00 | 0.37 | 35.05 | ENSG00000136997,ENSG00000128513                                                |

|    |                |                    |       |      |      |       |                                                                 |
|----|----------------|--------------------|-------|------|------|-------|-----------------------------------------------------------------|
| 22 | GOTERM_BP_FAT  | GO0032844          | 47.47 | 1.00 | 0.37 | 35.05 | ENSG00000136997,ENSG00000128513                                 |
| 23 | UP_SEQ_FEATURE | domain             | 49.64 | 0.67 | 0.67 | 25.92 | ENSG00000136997,ENSG00000187098                                 |
| 24 | UP_SEQ_FEATURE | domain             | 47.90 | 0.68 | 0.44 | 26.72 | ENSG00000136997,ENSG00000187098                                 |
| 25 | GOTERM_CC_FAT  | GO0031981          | 6.61  | 0.65 | 0.41 | 26.41 | ENSG00000215301,ENSG00000136997,ENSG00000128513                 |
| 26 | GOTERM_CC_FAT  | GO0016604          | 38.04 | 0.68 | 0.32 | 28.48 | ENSG00000215301,ENSG00000136997                                 |
| 27 | INTERPRO       | IPR001092          | 41.75 | 0.63 | 0.63 | 28.15 | ENSG00000136997,ENSG00000187098                                 |
| 28 | SMART          | SM00353            | 31.86 | 0.26 | 0.26 | 21.49 | ENSG00000136997,ENSG00000187098                                 |
| 29 | UP_SEQ_FEATURE | DNA-binding region | 33.92 | 0.80 | 0.42 | 35.57 | ENSG00000136997,ENSG00000187098                                 |
| 30 | GOTERM_BP_FAT  | GO0051345          | 30.23 | 1.00 | 0.50 | 49.30 | ENSG00000136997,ENSG00000128513                                 |
| 31 | GOTERM_CC_FAT  | GO0070013          | 5.39  | 0.79 | 0.32 | 36.69 | ENSG00000215301,ENSG00000136997,ENSG00000128513                 |
| 32 | KEGG_PATHWAY   | hsa04622           | 28.65 | 0.66 | 0.41 | 34.40 | ENSG00000215301,ENSG00000131323                                 |
| 33 | GOTERM_CC_FAT  | GO0043233          | 5.27  | 0.81 | 0.28 | 37.99 | ENSG00000215301,ENSG00000136997,ENSG00000128513                 |
| 34 | GOTERM_CC_FAT  | GO0031974          | 5.17  | 0.82 | 0.25 | 39.14 | ENSG00000215301,ENSG00000136997,ENSG00000128513                 |
| 35 | GOTERM_BP_FAT  | GO0033043          | 24.94 | 1.00 | 0.55 | 56.16 | ENSG00000136997,ENSG00000128513                                 |
| 36 | KEGG_PATHWAY   | hsa05222           | 24.21 | 0.72 | 0.34 | 39.32 | ENSG00000136997,ENSG00000131323                                 |
| 37 | GOTERM_MF_FAT  | GO0043566          | 25.58 | 0.95 | 0.78 | 46.95 | ENSG00000136997,ENSG00000128513                                 |
| 38 | GOTERM_BP_FAT  | GO0007423          | 23.63 | 1.00 | 0.55 | 58.13 | ENSG00000136997,ENSG00000187098                                 |
| 39 | GOTERM_MF_FAT  | GO0003677          | 3.18  | 0.97 | 0.69 | 52.12 | ENSG00000215301,ENSG00000136997,ENSG00000187098,ENSG00000128513 |
| 40 | GOTERM_BP_FAT  | GO0043086          | 19.54 | 1.00 | 0.60 | 65.18 | ENSG00000129084,ENSG00000128513                                 |
| 41 | GOTERM_BP_FAT  | GO0006917          | 16.91 | 1.00 | 0.64 | 70.50 | ENSG00000136997,ENSG00000131323                                 |
| 42 | GOTERM_BP_FAT  | GO0012502          | 16.86 | 1.00 | 0.62 | 70.61 | ENSG00000136997,ENSG00000131323                                 |

|    |                 |                 |       |      |      |       |                                 |
|----|-----------------|-----------------|-------|------|------|-------|---------------------------------|
| 43 | GOTERM_BP_FAT   | GO0044092       | 16.20 | 1.00 | 0.62 | 72.05 | ENSG00000129084,ENSG00000128513 |
| 44 | SP_PIR_KEYWORDS | isopeptide bond | 17.23 | 0.98 | 0.74 | 60.07 | ENSG00000187098,ENSG00000129084 |
| 45 | GOTERM_BP_FAT   | GO0051336       | 16.06 | 1.00 | 0.61 | 72.38 | ENSG00000136997,ENSG00000128513 |

### Golden retriever B-cell lymphoma, top 15 significantly mutated genes

| Category | Term            | Description      | % input genes implicated                             | p-value | List Total | Pop Hits | Pop Total |       |
|----------|-----------------|------------------|------------------------------------------------------|---------|------------|----------|-----------|-------|
| 1        | GOTERM_BP_FAT   | GO0051095        | regulation of helicase activity                      | 14.3    | 5.68E-03   | 12       | 7         | 13528 |
| 2        | GOTERM_CC_FAT   | GO0005829        | cytosol                                              | 28.6    | 9.56E-03   | 6        | 1330      | 12782 |
| 3        | SP_PIR_KEYWORDS | nucleus          |                                                      | 57.1    | 1.28E-02   | 14       | 4283      | 19235 |
| 4        | GOTERM_BP_FAT   | GO0043086        | negative regulation of catalytic activity            | 21.4    | 2.03E-02   | 12       | 277       | 13528 |
| 5        | GOTERM_BP_FAT   | GO0008156        | negative regulation of DNA replication               | 14.3    | 2.25E-02   | 12       | 28        | 13528 |
| 6        | BIOCARTA        | h_rnaPathway     | Double stranded RNA induced gene expression          | 14.3    | 2.48E-02   | 5        | 9         | 1437  |
| 7        | GOTERM_BP_FAT   | GO0044092        | negative regulation of molecular function            | 21.4    | 2.89E-02   | 12       | 334       | 13528 |
| 8        | GOTERM_BP_FAT   | GO0051336        | regulation of hydrolase activity                     | 21.4    | 2.93E-02   | 12       | 337       | 13528 |
| 9        | GOTERM_BP_FAT   | GO0051053        | negative regulation of DNA metabolic process         | 14.3    | 3.13E-02   | 12       | 39        | 13528 |
| 10       | BIOCARTA        | h_cd40Pathway    | CD40L Signaling Pathway                              | 14.3    | 3.84E-02   | 5        | 14        | 1437  |
| 11       | BIOCARTA        | h_tall1Pathway   | TACI and BCMA stimulation of B cell immune responses | 14.3    | 3.84E-02   | 5        | 14        | 1437  |
| 12       | GOTERM_CC_FAT   | GO0005654        | nucleoplasm                                          | 21.4    | 4.13E-02   | 6        | 882       | 12782 |
| 13       | UP_SEQ_FEATURE  | mutagenesis site |                                                      | 35.7    | 4.24E-02   | 14       | 2045      | 19113 |
| 14       | GOTERM_MF_FAT   | GO0003697        | single-stranded DNA binding                          | 14.3    | 4.56E-02   | 12       | 55        | 12983 |
| 15       | BIOCARTA        | h_tnfr2Pathway   | TNFR2 Signaling Pathway                              | 14.3    | 4.65E-02   | 5        | 17        | 1437  |
| 16       | SP_PIR_KEYWORDS | activator        |                                                      | 21.4    | 4.67E-02   | 14       | 520       | 19235 |

|    |                 |             |                                           |      |          |    |      |       |
|----|-----------------|-------------|-------------------------------------------|------|----------|----|------|-------|
| 17 | GOTERM_BP_FAT   | GO0006275   | regulation of DNA replication             | 14.3 | 4.93E-02 | 12 | 62   | 13528 |
| 18 | GOTERM_BP_FAT   | GO0051276   | chromosome organization                   | 21.4 | 5.70E-02 | 12 | 485  | 13528 |
| 19 | GOTERM_CC_FAT   | GO0016604   | nuclear body                              | 14.3 | 6.40E-02 | 6  | 168  | 12782 |
| 20 | GOTERM_BP_FAT   | GO0043085   | positive regulation of catalytic activity | 21.4 | 6.45E-02 | 12 | 520  | 13528 |
| 21 | GOTERM_BP_FAT   | GO0043632   | modification-dependent macromolecule      | 21.4 | 7.67E-02 | 12 | 574  | 13528 |
| 22 | GOTERM_BP_FAT   | GO0019941   | modification-dependent protein            | 21.4 | 7.67E-02 | 12 | 574  | 13528 |
| 23 | GOTERM_BP_FAT   | GO0044093   | catabolic process                         | 21.4 | 7.95E-02 | 12 | 586  | 13528 |
| 24 | GOTERM_BP_FAT   | GO0051603   | positive regulation of molecular function | 21.4 | 8.29E-02 | 12 | 600  | 13528 |
| 25 | GOTERM_BP_FAT   | GO0044257   | proteolysis involved in cellular protein  | 21.4 | 8.36E-02 | 12 | 603  | 13528 |
| 26 | GOTERM_BP_FAT   | GO0007568   | catabolic process                         | 21.4 | 8.59E-02 | 12 | 110  | 13528 |
| 27 | GOTERM_BP_FAT   | GO0030163   | cellular protein catabolic process        | 21.4 | 8.82E-02 | 12 | 622  | 13528 |
| 28 | GOTERM_BP_FAT   | GO0051052   | aging                                     | 14.3 | 8.89E-02 | 12 | 114  | 13528 |
| 29 | SP_PIR_KEYWORDS | acetylation | regulation of DNA metabolic process       | 35.7 | 9.07E-02 | 14 | 2635 | 19235 |
| 30 | BBID            | 99          | NF-kB_activation                          | 14.3 | 9.28E-02 | 3  | 17   | 358   |

### Golden retriever B-cell lymphoma, continued

| Category | Term            | Fold Enrichment | Bonferroni | Benjamini | FDR  | Genes |                                                                                              |
|----------|-----------------|-----------------|------------|-----------|------|-------|----------------------------------------------------------------------------------------------|
| 1        | GOTERM_BP_FAT   | GO0051095       | 322.10     | 0.85      | 0.85 | 7.45  | <i>ENSG00000141510,ENSG00000128513</i>                                                       |
| 2        | GOTERM_CC_FAT   | GO0005829       | 6.41       | 0.34      | 0.34 | 8.56  | <i>ENSG00000198242,ENSG00000141510,ENSG00000129084,ENSG00000006062</i>                       |
| 3        | SP_PIR_KEYWORDS | nucleus         | 2.57       | 0.55      | 0.55 | 12.20 | <i>ENSG00000215301,ENSG00000109670,ENSG00000141510,ENSG00000129084,ENSG00000100000128513</i> |
| 4        | GOTERM_BP_FAT   | GO0043086       | 12.21      | 1.00      | 0.97 | 24.36 | <i>ENSG00000141510,ENSG00000129084,ENSG00000128513</i>                                       |
| 5        | GOTERM_BP_FAT   | GO0008156       | 80.52      | 1.00      | 0.92 | 26.64 | <i>ENSG00000141510,ENSG00000128513</i>                                                       |
| 6        | BIOCARTA        | h_rnaPathway    | 63.87      | 0.55      | 0.55 | 19.58 | <i>ENSG00000141510,ENSG00000006062</i>                                                       |

|    |                 |                  |       |      |      |       |                                                                             |
|----|-----------------|------------------|-------|------|------|-------|-----------------------------------------------------------------------------|
| 7  | GOTERM_BP_FAT   | GO0044092        | 10.13 | 1.00 | 0.91 | 32.82 | ENSG00000141510,ENSG00000129084,ENSG0000128513                              |
| 8  | GOTERM_BP_FAT   | GO0051336        | 10.04 | 1.00 | 0.86 | 33.27 | ENSG00000214946,ENSG00000141510,ENSG0000128513                              |
| 9  | GOTERM_BP_FAT   | GO0051053        | 57.81 | 1.00 | 0.83 | 35.06 | ENSG00000141510,ENSG00000128513                                             |
| 10 | BIOCARTA        | h_cd40Pathway    | 41.06 | 0.71 | 0.47 | 28.79 | ENSG00000131323,ENSG00000006062                                             |
| 11 | BIOCARTA        | h_tall1Pathway   | 41.06 | 0.71 | 0.47 | 28.79 | ENSG00000131323,ENSG00000006062                                             |
| 12 | GOTERM_CC_FAT   | GO0005654        | 7.25  | 0.84 | 0.60 | 32.49 | ENSG00000215301,ENSG00000141510,ENSG0000128513                              |
| 13 | UP_SEQ_FEATURE  | mutagenesis site | 3.34  | 0.96 | 0.96 | 36.46 | ENSG00000215301,ENSG00000141510,ENSG0000181555,ENSG00000146278,ENSG00000006 |
| 14 | GOTERM_MF_FAT   | GO0003697        | 39.34 | 0.98 | 0.98 | 39.29 | ENSG00000141510,ENSG00000128513                                             |
| 15 | BIOCARTA        | h_tnfr2Pathway   | 33.81 | 0.78 | 0.40 | 33.81 | ENSG00000131323,ENSG00000006062                                             |
| 16 | SP_PIR_KEYWORDS | activator        | 7.93  | 0.95 | 0.77 | 38.20 | ENSG00000141510,ENSG00000181555,ENSG0000146278                              |
| 17 | GOTERM_BP_FAT   | GO0006275        | 36.37 | 1.00 | 0.91 | 49.68 | ENSG00000141510,ENSG00000128513                                             |
| 18 | GOTERM_BP_FAT   | GO0051276        | 6.97  | 1.00 | 0.91 | 54.92 | ENSG00000141510,ENSG00000181555,ENSG0000128513                              |
| 19 | GOTERM_CC_FAT   | GO0016604        | 25.36 | 0.94 | 0.61 | 45.97 | ENSG00000215301,ENSG00000141510                                             |
| 20 | GOTERM_BP_FAT   | GO0043085        | 6.50  | 1.00 | 0.92 | 59.57 | ENSG00000141510,ENSG00000129084,ENSG0000128513                              |
| 21 | GOTERM_BP_FAT   | GO0043632        | 5.89  | 1.00 | 0.93 | 66.19 | ENSG00000120833,ENSG00000109670,ENSG0000129084                              |
| 22 | GOTERM_BP_FAT   | GO0019941        | 5.89  | 1.00 | 0.93 | 66.19 | ENSG00000120833,ENSG00000109670,ENSG0000129084                              |
| 23 | GOTERM_BP_FAT   | GO0044093        | 5.77  | 1.00 | 0.92 | 67.57 | ENSG00000141510,ENSG00000129084,ENSG0000128513                              |



|    |                 |             |       |      |      |       |                                                                                           |
|----|-----------------|-------------|-------|------|------|-------|-------------------------------------------------------------------------------------------|
| 24 | GOTERM_BP_FAT   | GO0051603   | 5.64  | 1.00 | 0.91 | 69.13 | <i>ENSG00000120833,ENSG00000109670,ENSG00000129084</i>                                    |
| 25 | GOTERM_BP_FAT   | GO0044257   | 5.61  | 1.00 | 0.89 | 69.46 | <i>ENSG00000120833,ENSG00000109670,ENSG00000129084</i>                                    |
| 26 | GOTERM_BP_FAT   | GO0007568   | 20.50 | 1.00 | 0.88 | 70.50 | <i>ENSG00000120833,ENSG00000141510</i>                                                    |
| 27 | GOTERM_BP_FAT   | GO0030163   | 5.44  | 1.00 | 0.87 | 71.48 | <i>ENSG00000120833,ENSG00000109670,ENSG00000129084</i>                                    |
| 28 | GOTERM_BP_FAT   | GO0051052   | 19.78 | 1.00 | 0.86 | 71.79 | <i>ENSG00000141510,ENSG00000128513</i>                                                    |
| 29 | SP_PIR_KEYWORDS | acetylation | 2.61  | 1.00 | 0.86 | 61.55 | <i>ENSG00000215301,ENSG00000198242,ENSG00000141510,ENSG00000129084,ENSG00000100000100</i> |
| 30 | BBID            | 99          | 14.04 | 0.54 | 0.54 | 41.34 | <i>ENSG00000141510,ENSG00000006062</i>                                                    |

### Boxer T-cell lymphoma

| Category | Term           | Description                                                 | % input genes implicated | p-value  | List Total | Pop Hits | Pop Total |
|----------|----------------|-------------------------------------------------------------|--------------------------|----------|------------|----------|-----------|
| 1        | UP_SEQ_FEATURE | mutagenesis site                                            | 80.0                     | 4.50E-03 | 5          | 2045     | 19113     |
| 2        | KEGG_PATHWAY   | hsa05213 Endometrial cancer                                 | 40.0                     | 1.02E-02 | 2          | 52       | 5085      |
| 3        | KEGG_PATHWAY   | hsa05214 Glioma                                             | 40.0                     | 1.24E-02 | 2          | 63       | 5085      |
| 4        | GOTERM_BP_FAT  | GO0007162 negative regulation of cell adhesion              | 40.0                     | 1.27E-02 | 5          | 43       | 13528     |
| 5        | KEGG_PATHWAY   | hsa05218 Melanoma                                           | 40.0                     | 1.40E-02 | 2          | 71       | 5085      |
| 6        | GOTERM_BP_FAT  | GO0051291 protein heterooligomerization                     | 40.0                     | 1.53E-02 | 5          | 52       | 13528     |
| 7        | KEGG_PATHWAY   | hsa05215 Prostate cancer                                    | 40.0                     | 1.75E-02 | 2          | 89       | 5085      |
| 8        | BIOCARTA       | h_metPathway Signaling of Hepatocyte Growth Factor Receptor | 40.0                     | 2.37E-02 | 2          | 34       | 1437      |
| 9        | GOTERM_CC_FAT  | GO0030425 dendrite                                          | 40.0                     | 2.53E-02 | 3          | 163      | 12782     |

|    |                 |             |                                       |      |          |   |      |       |
|----|-----------------|-------------|---------------------------------------|------|----------|---|------|-------|
| 10 | GOTERM_CC_FAT   | GO0043025   | cell soma                             | 40.0 | 2.61E-02 | 3 | 168  | 12782 |
| 11 | GOTERM_MF_FAT   | GO0004725   | protein tyrosine phosphatase activity | 40.0 | 3.17E-02 | 5 | 104  | 12983 |
| 12 | GOTERM_CC_FAT   | GO0044463   | cell projection part                  | 40.0 | 3.63E-02 | 3 | 234  | 12782 |
| 13 | KEGG_PATHWAY    | hsa04510    | Focal adhesion                        | 40.0 | 3.95E-02 | 2 | 201  | 5085  |
| 14 | GOTERM_BP_FAT   | GO0030155   | regulation of cell adhesion           | 40.0 | 3.99E-02 | 5 | 137  | 13528 |
| 15 | GOTERM_BP_FAT   | GO0030334   | regulation of cell migration          | 40.0 | 4.90E-02 | 5 | 169  | 13528 |
| 16 | GOTERM_MF_FAT   | GO0004721   | phosphoprotein phosphatase activity   | 40.0 | 4.99E-02 | 5 | 165  | 12983 |
| 17 | GOTERM_BP_FAT   | GO0051259   | protein oligomerization               | 40.0 | 5.05E-02 | 5 | 174  | 13528 |
| 18 | GOTERM_CC_FAT   | GO0043005   | neuron projection                     | 40.0 | 5.28E-02 | 3 | 342  | 12782 |
| 19 | GOTERM_BP_FAT   | GO0040012   | regulation of locomotion              | 40.0 | 5.56E-02 | 5 | 192  | 13528 |
| 20 | GOTERM_BP_FAT   | GO0048545   | response to steroid hormone stimulus  | 40.0 | 5.56E-02 | 5 | 192  | 13528 |
| 21 | GOTERM_BP_FAT   | GO0051270   | regulation of cell motion             | 40.0 | 5.59E-02 | 5 | 193  | 13528 |
| 22 | KEGG_PATHWAY    | hsa05200    | Pathways in cancer                    | 40.0 | 6.45E-02 | 2 | 328  | 5085  |
| 23 | GOTERM_BP_FAT   | GO0031175   | neuron projection development         | 40.0 | 7.36E-02 | 5 | 256  | 13528 |
| 24 | GOTERM_MF_FAT   | GO0016791   | phosphatase activity                  | 40.0 | 7.45E-02 | 5 | 249  | 12983 |
| 25 | SP_PIR_KEYWORDS | acetylation |                                       | 60.0 | 9.31E-02 | 5 | 2635 | 19235 |
| 26 | GOTERM_BP_FAT   | GO0048666   | neuron development                    | 40.0 | 9.65E-02 | 5 | 339  | 13528 |
| 27 | GOTERM_BP_FAT   | GO0045859   | regulation of protein kinase activity | 40.0 | 9.82E-02 | 5 | 345  | 13528 |

#### Boxer T-cell lymphoma, continued

| Category | Term           | Fold Enrichment  | Bonferroni | Benjamini | FDR  | Genes |                                                                        |
|----------|----------------|------------------|------------|-----------|------|-------|------------------------------------------------------------------------|
| 1        | UP_SEQ_FEATURE | mutagenesis site | 7.48       | 0.20      | 0.20 | 4.25  | <i>ENSG00000184408,ENSG00000171862,ENSG00000169032,ENSG00000182568</i> |
| 2        | KEGG_PATHWAY   | hsa05213         | 97.79      | 0.35      | 0.35 | 9.07  | <i>ENSG00000171862,ENSG00000169032</i>                                 |
| 3        | KEGG_PATHWAY   | hsa05214         | 80.71      | 0.41      | 0.23 | 10.90 | <i>ENSG00000171862,ENSG00000169032</i>                                 |
| 4        | GOTERM_BP_FAT  | GO0007162        | 125.84     | 0.96      | 0.96 | 15.34 | <i>ENSG00000171862,ENSG00000169032</i>                                 |

|    |                 |              |        |      |      |       |                                                        |
|----|-----------------|--------------|--------|------|------|-------|--------------------------------------------------------|
| 5  | KEGG_PATHWAY    | hsa05218     | 71.62  | 0.45 | 0.18 | 12.20 | <i>ENSG00000171862,ENSG00000169032</i>                 |
| 6  | GOTERM_BP_FAT   | GO0051291    | 104.06 | 0.98 | 0.87 | 18.25 | <i>ENSG00000184408,ENSG00000169032</i>                 |
| 7  | KEGG_PATHWAY    | hsa05215     | 57.13  | 0.52 | 0.17 | 15.08 | <i>ENSG00000171862,ENSG00000169032</i>                 |
| 8  | BIOCARTA        | h_metPathway | 42.26  | 0.70 | 0.70 | 20.60 | <i>ENSG00000171862,ENSG00000169032</i>                 |
| 9  | GOTERM_CC_FAT   | GO0030425    | 52.28  | 0.65 | 0.65 | 21.04 | <i>ENSG00000184408,ENSG00000169032</i>                 |
| 10 | GOTERM_CC_FAT   | GO0043025    | 50.72  | 0.66 | 0.42 | 21.61 | <i>ENSG00000184408,ENSG00000169032</i>                 |
| 11 | GOTERM_MF_FAT   | GO0004725    | 49.93  | 0.89 | 0.89 | 28.18 | <i>ENSG00000171862,ENSG00000169032</i>                 |
| 12 | GOTERM_CC_FAT   | GO0044463    | 36.42  | 0.78 | 0.40 | 28.83 | <i>ENSG00000184408,ENSG00000169032</i>                 |
| 13 | KEGG_PATHWAY    | hsa04510     | 25.30  | 0.82 | 0.29 | 31.15 | <i>ENSG00000171862,ENSG00000169032</i>                 |
| 14 | GOTERM_BP_FAT   | GO0030155    | 39.50  | 1.00 | 0.97 | 41.29 | <i>ENSG00000171862,ENSG00000169032</i>                 |
| 15 | GOTERM_BP_FAT   | GO0030334    | 32.02  | 1.00 | 0.96 | 48.20 | <i>ENSG00000171862,ENSG00000169032</i>                 |
| 16 | GOTERM_MF_FAT   | GO0004721    | 31.47  | 0.97 | 0.82 | 40.93 | <i>ENSG00000171862,ENSG00000169032</i>                 |
| 17 | GOTERM_BP_FAT   | GO0051259    | 31.10  | 1.00 | 0.93 | 49.20 | <i>ENSG00000184408,ENSG00000169032</i>                 |
| 18 | GOTERM_CC_FAT   | GO0043005    | 24.92  | 0.89 | 0.43 | 39.30 | <i>ENSG00000184408,ENSG00000169032</i>                 |
| 19 | GOTERM_BP_FAT   | GO0040012    | 28.18  | 1.00 | 0.92 | 52.66 | <i>ENSG00000171862,ENSG00000169032</i>                 |
| 20 | GOTERM_BP_FAT   | GO0048545    | 28.18  | 1.00 | 0.92 | 52.66 | <i>ENSG00000171862,ENSG00000169032</i>                 |
| 21 | GOTERM_BP_FAT   | GO0051270    | 28.04  | 1.00 | 0.88 | 52.85 | <i>ENSG00000171862,ENSG00000169032</i>                 |
| 22 | KEGG_PATHWAY    | hsa05200     | 15.50  | 0.94 | 0.37 | 46.05 | <i>ENSG00000171862,ENSG00000169032</i>                 |
| 23 | GOTERM_BP_FAT   | GO0031175    | 21.14  | 1.00 | 0.92 | 63.20 | <i>ENSG00000171862,ENSG00000169032</i>                 |
| 24 | GOTERM_MF_FAT   | GO0016791    | 20.86  | 0.99 | 0.83 | 54.93 | <i>ENSG00000171862,ENSG00000169032</i>                 |
| 25 | SP_PIR_KEYWORDS | acetylation  | 4.38   | 0.99 | 0.99 | 61.29 | <i>ENSG00000171862,ENSG00000169032,ENSG00000182568</i> |
| 26 | GOTERM_BP_FAT   | GO0048666    | 15.96  | 1.00 | 0.95 | 73.50 | <i>ENSG00000171862,ENSG00000169032</i>                 |
| 27 | GOTERM_BP_FAT   | GO0045859    | 15.68  | 1.00 | 0.93 | 74.12 | <i>ENSG00000171862,ENSG00000169032</i>                 |

### Golden retriever T-cell lymphoma, top 15 significantly mutated genes

| Category          | Term          | Description                       | % input genes implicated | p-value  | List Total | Pop Hits | Pop Total |
|-------------------|---------------|-----------------------------------|--------------------------|----------|------------|----------|-----------|
| 1 SP_PIR_KEYWORDS | acetylation   |                                   | 53.3                     | 1.27E-03 | 15         | 2635     | 19235     |
| 2 GOTERM_CC_FAT   | GO0005829     | cytosol                           | 33.3                     | 9.57E-03 | 10         | 1330     | 12782     |
| 3 SP_PIR_KEYWORDS | rrna-binding  |                                   | 13.3                     | 1.23E-02 | 15         | 17       | 19235     |
| 4 SP_PIR_KEYWORDS | mitochondrion |                                   | 26.7                     | 2.05E-02 | 15         | 832      | 19235     |
| 5 GOTERM_CC_FAT   | GO0022625     | cytosolic large ribosomal subunit | 13.3                     | 2.64E-02 | 10         | 38       | 12782     |
| 6 GOTERM_MF_FAT   | GO0019843     | rRNA binding                      | 13.3                     | 2.65E-02 | 13         | 29       | 12983     |
| 7 GOTERM_CC_FAT   | GO0005739     | mitochondrion                     | 26.7                     | 3.49E-02 | 10         | 1087     | 12782     |
| 8 GOTERM_CC_FAT   | GO0015934     | large ribosomal subunit           | 13.3                     | 4.62E-02 | 10         | 67       | 12782     |
| 9 GOTERM_CC_FAT   | GO0030529     | ribonucleoprotein complex         | 20.0                     | 4.83E-02 | 10         | 515      | 12782     |
| 10 GOTERM_CC_FAT  | GO0022626     | cytosolic ribosome                | 13.3                     | 5.56E-02 | 10         | 81       | 12782     |
| 11 GOTERM_CC_FAT  | GO0044429     | mitochondrial part                | 20.0                     | 6.27E-02 | 10         | 595      | 12782     |
| 12 GOTERM_BP_FAT  | GO0009611     | response to wounding              | 20.0                     | 6.67E-02 | 12         | 530      | 13528     |
| 13 GOTERM_BP_FAT  | GO0006414     | translational elongation          | 13.3                     | 7.92E-02 | 12         | 101      | 13528     |
| 14 GOTERM_MF_FAT  | GO0015078     | hydrogen ion                      | 13.3                     | 8.01E-02 | 13         | 90       | 12983     |
| 15 GOTERM_CC_FAT  | GO0033279     | ribosomal subunit                 | 13.3                     | 8.66E-02 | 10         | 128      | 12782     |
| 16 GOTERM_MF_FAT  | GO0015077     | monovalent inorganic cation       | 13.3                     | 9.20E-02 | 13         | 104      | 12983     |

### Golden retriever T-cell lymphoma, top 15 significantly mutated genes, continued

| Category          | Term        | Fold Enrichment | Bonferroni | Benjamini | FDR  | Genes                                                                               |
|-------------------|-------------|-----------------|------------|-----------|------|-------------------------------------------------------------------------------------|
| 1 SP_PIR_KEYWORDS | acetylation | 3.89            | 0.09       | 0.09      | 1.32 | <i>ENSG00000111679,ENSG00000182890,ENSG00000142676,ENSG00000198242,ENSG00000111</i> |
| 2 GOTERM_CC_FAT   | GO0005829   | 4.81            | 0.39       | 0.39      | 8.88 | <i>ENSG00000111679,ENSG00000142676,ENSG00000198242,ENSG00000129084,ENSG00000171</i> |

|    |                 |               |        |      |      |       |                                                                        |
|----|-----------------|---------------|--------|------|------|-------|------------------------------------------------------------------------|
| 3  | SP_PIR_KEYWORDS | rrna-binding  | 150.86 | 0.59 | 0.36 | 12.09 | <i>ENSG00000142676,ENSG00000198242</i>                                 |
| 4  | SP_PIR_KEYWORDS | mitochondrion | 6.17   | 0.78 | 0.39 | 19.42 | <i>ENSG00000176340,ENSG00000182890,ENSG00000171487,ENSG00000167863</i> |
| 5  | GOTERM_CC_FAT   | GO0022625     | 67.27  | 0.75 | 0.50 | 22.84 | <i>ENSG00000142676,ENSG00000198242</i>                                 |
| 6  | GOTERM_MF_FAT   | GO0019843     | 68.88  | 0.85 | 0.85 | 24.26 | <i>ENSG00000142676,ENSG00000198242</i>                                 |
| 7  | GOTERM_CC_FAT   | GO0005739     | 4.70   | 0.84 | 0.45 | 29.08 | <i>ENSG00000176340,ENSG00000182890,ENSG00000171487,ENSG00000167863</i> |
| 8  | GOTERM_CC_FAT   | GO0015934     | 38.16  | 0.91 | 0.45 | 36.73 | <i>ENSG00000142676,ENSG00000198242</i>                                 |
| 9  | GOTERM_CC_FAT   | GO0030529     | 7.45   | 0.92 | 0.40 | 38.08 | <i>ENSG00000142676,ENSG00000198242,ENSG00000129084</i>                 |
| 10 | GOTERM_CC_FAT   | GO0022626     | 31.56  | 0.95 | 0.39 | 42.52 | <i>ENSG00000142676,ENSG00000198242</i>                                 |
| 11 | GOTERM_CC_FAT   | GO0044429     | 6.44   | 0.96 | 0.38 | 46.53 | <i>ENSG00000176340,ENSG00000182890,ENSG00000167863</i>                 |
| 12 | GOTERM_BP_FAT   | GO0009611     | 6.38   | 1.00 | 1.00 | 58.01 | <i>ENSG00000111679,ENSG00000111144,ENSG00000169403</i>                 |
| 13 | GOTERM_BP_FAT   | GO0006414     | 22.32  | 1.00 | 1.00 | 64.55 | <i>ENSG00000142676,ENSG00000198242</i>                                 |
| 14 | GOTERM_MF_FAT   | GO0015078     | 22.19  | 1.00 | 0.95 | 57.86 | <i>ENSG00000176340,ENSG00000167863</i>                                 |
| 15 | GOTERM_CC_FAT   | GO0033279     | 19.97  | 0.99 | 0.44 | 58.38 | <i>ENSG00000142676,ENSG00000198242</i>                                 |
| 16 | GOTERM_MF_FAT   | GO0015077     | 19.21  | 1.00 | 0.89 | 63.18 | <i>ENSG00000176340,ENSG00000167863</i>                                 |
